# Supplementary material for: Pharmacophore-guided discovery of CDC25 inhibitors causing cell cycle arrest and tumor regression
Source: PubMed Central journal article supplement (PMC6362118; doi:10.1038/s41598-019-38579-7), 2019-02-04
Supplement: 41598_2019_38579_MOESM1_ESM.pdf [file 41598_2019_38579_MOESM1_ESM.pdf]

1         **Pharmacophore-guided discovery of CDC25 inhibitors causing cell**  
2                     **cycle arrest and tumor regression**

3  
4  
5     Zeynep Kabakci<sup>1\*</sup>, Simon Käppeli<sup>1\*</sup>, Claudio Cantù<sup>2,3,4\*</sup>, Lasse D. Jensen<sup>5\*</sup>, Christiane  
6     König<sup>1</sup>, Janine Toggweiler<sup>4</sup>, Christian Gentili<sup>1</sup>, Giovanni Ribaudó<sup>6</sup>, Giuseppe Zagotto<sup>6</sup>,  
7     Konrad Basler<sup>4</sup>, Lorenzo A. Pinna<sup>7</sup>, Giorgio Cozza<sup>8,9</sup> and Stefano Ferrari<sup>1,9</sup>  
8  
9

10    <sup>1</sup>Institute of Molecular Cancer Research, University of Zurich, Winterthurerstrasse 190,  
11    CH-8057 Zurich, Switzerland

12    <sup>2</sup>Department of Clinical and Experimental Medicine, Campus US, University of  
13    Linköping, S-58183 Linköping, Sweden

14    <sup>3</sup>Wallenberg Centre for Molecular Medicine, University of Linköping, S-58183  
15    Linköping, Sweden

16    <sup>4</sup>Institute of Molecular Life Sciences, University of Zurich, Winterthurerstrasse 190, CH-  
17    8057 Zurich, Switzerland

18    <sup>5</sup>Department of Medical and Health Sciences, Campus US, University of Linköping, S-  
19    58183 Linköping, Sweden

20    <sup>6</sup>Department of Pharmacology, University of Padua, Via U. Bassi 58/B, I-35131 Padua,  
21    Italy

22    <sup>7</sup>Department of Biomedical Sciences, University of Padua, Via U. Bassi 58/B, I-35131  
23    Padua, Italy

24    <sup>8</sup>Department of Molecular Medicine, University of Padua, Via U. Bassi 58/B, I-35131  
25    Padua, Italy

26    <sup>9</sup>Corresponding Authors

27  
28  
29  
30  
31  
32  
33    **SUPPLEMENTARY FILES**

## 34 SUPPLEMENTARY MATERIALS AND METHODS

35

36 **Antibodies and chemicals** - The following antibodies were used for Western blot:  
37 Rabbit monoclonal antibodies to CDK1-pThr<sub>14</sub> (#2543), CDK1-pTy<sub>15</sub> (#9111), Histone  
38 H3-pSer<sub>10</sub> (#9701) and CDC25B (#9525) were purchased from Cell Signaling  
39 Technology (Beverly, MA, USA). Mouse monoclonal antibodies to CDC25A (F-6, sc-  
40 7389), CDC25C (C-20, sc-327) and  $\alpha$ -tubulin (YOL 1/34, sc-53030) were purchased  
41 from Santa Cruz Biotechnology (Santa Cruz, CA, USA). The mouse monoclonal  
42 antibody MPM2 (05-368) was from Upstate (Lake Placid, NY, USA). The mouse  
43 monoclonal antibody to the HA tag (HA.11, MMS-101P) was from BioLegend (S. Diego,  
44 CA, USA). The rabbit polyclonal antibody to PARP-1 (#227244) was obtained from  
45 Abcam. HRP-conjugated anti-mouse and anti-rabbit secondary antibodies were obtained  
46 from GE-Healthcare (Otelfingen, Switzerland). HRP-conjugated IgG- $\kappa$ -BP was  
47 purchased from Santa Cruz Biotechnology (Santa Cruz, CA, USA).

48 The following antibodies were used for immunofluorescence on a Zeiss LSM 710  
49 confocal microscope: mouse monoclonal to beta-catenin (Cl. 14, BD transduction Lab.),  
50 rabbit polyclonal to lysozyme (A0099, Dako). Secondary antibodies were: Alexa 488  
51 goat anti-mouse, Alexa 555 goat anti-rabbit. Nuclei were visualized with 4',6-Diamidino-  
52 2-Phenylindole (DAPI, Sigma-Aldrich).

53 The CDK1 inhibitor Ro-3306 (Roche, Switzerland) was dissolved in DMSO at 9 mM  
54 stock concentration and stored in aliquots at -20 °C. Thymidine was obtained from  
55 SynGen Research Inc. (Sacramento, CA, USA) and dissolved in PBS as 200 mM stock  
56 solution before use. NSC-663284 (Sigma-Aldrich, Buchs, Switzerland) as well as all  
57 UPD compounds were dissolved in DMSO at 10 mM stock concentration and stored in  
58 aliquots at -20 °C.

59

60 **Expression and purification of CDC25 phosphatases** - CDC25A (kind gift of I.  
61 Hoffmann, Heidelberg, Germany), CDC25B and CDC25C (kind gift of B. Gabrielli,  
62 Queensland, Australia) in pGEX were expressed in *E. coli* BL21 cells and purified on 1  
63 ml Glutathione Sepharose 4 Fast Flow columns as described <sup>1</sup>.

64

65 **Enzymatic assays** - CDC25A, CDC25B and CDC25C were appropriately diluted in 10  
66 mM Tris-HCl pH 8.0, 50 mM NaCl and assayed in 20 mM Tris-HCl pH 8.0, 75 mM  
67 NaCl, 0.5 mM EGTA, 1 mM DTT, 0.1 mg/ml BSA and defined concentrations of  
68 compounds. Reactions were started by addition of the substrate OMFP (0.1 mM). Assays  
69 were carried out at room temperature in duplicate or triplicate using transparent-bottom,  
70 V-shaped 96 well plates and read at defined intervals on a Molecular Devices  
71 SpectraMax microplate reader (ex: 490 nm / em: 525 nm). IC<sub>50</sub> and kinetic parameters  
72 calculated from Lineweaver-Burk double-reciprocal plots of the data were obtained using  
73 GraphPad Prism software.

74

75 **Cell culture** - Wild-type HeLa and Kyoto HeLa cells stably expressing mCherry-H2B  
76 were maintained in DMEM+L-Glutamine (Gibco, Life Technologies, USA)  
77 supplemented with 5% fetal calf serum (FCS) (Gibco) and penicillin-streptomycin (100  
78 U/ml - 100 µg/ml) (Gibco). A549 and Colo741 were grown and maintained like HeLa  
79 cells but with 10% FCS. HCT116 were maintained in McCoy's medium supplemented  
80 with 10% FCS and penicillin-streptomycin. U2OS-Tet-OFF cells expressing HA-CDC25  
81 were grown and maintained in DMEM+L-Glutamine, 10% Tet-free FCS and penicillin-  
82 streptomycin in the presence or the absence of 4 µg/ml tetracycline (Sigma, T7660).

83

84 **Cell synchronization** - Cell synchronization was performed by double thymidine block-  
85 release protocol <sup>2</sup> or nocodazole treatment <sup>3</sup> and verified by flow cytometry.

86

87 **Cell viability assays** - Compounds viability upon 48h treatment with the compounds was  
88 assessed as described <sup>4</sup>. Data were plotted with Prism 7<sup>®</sup> and analyzed by non-linear  
89 regression. Comparison of single curve fitting to all data set within an experiment was  
90 performed with the extra sum-of-squares F-test to determine P values.

91

92 **Western blotting** - Cell lysis and immunoblot analysis were performed as previously  
93 described <sup>5</sup>. Proteins were revealed using the Western blotting detection kit  
94 WesternBright™ ECL (Advansta, Menlo Park, CA, USA) and signal imaged using the  
95 Fusion Solo system (Vilber Lourmat).

96

97 **Flow Cytometry** - To quantify DNA content cells were harvested, fixed with 70%  
98 ethanol (-20 °C) and stored overnight at +4 °C. Cells were washed with PBS, resuspended  
99 in PBS containing 0.1 mg/ml RNase and DNA was stained with 1 µg/ml DAPI. To  
100 quantify phosphorylation of CDK1 at Tyr<sub>15</sub> and H2AX at S<sub>139</sub>, cells were harvested and  
101 examined as described <sup>6</sup>. Samples were measured on an Attune™ NxT Cytometer  
102 (ThermoFisher Scientific, Carlsbad, CA, USA) and data were analyzed with FlowJo®  
103 software v10 (FlowJo, LLC, Ashland, OR, USA).

104

105 **Real Time qRT-PCR** - Organoids were lysed in Tri-Reagent (Sigma) as previously  
106 described <sup>7</sup> and total RNA was isolated as described by manufacturer's instructions. For  
107 cDNA synthesis 1µg of total RNA was used and cDNA was synthesized by Transcription  
108 High Fidelity cDNA Synthesis kit (Roche). Real-time quantitative PCR reactions were  
109 performed in three independent biological replicates, each with technical triplicate, using  
110 the Applied Biosystems SYBR Green Kit and monitored by the ABI Prism 7900HT  
111 system (Applied Biosystem). The following primers were used:

112 *Lgr5*: Forward 5'-CTCCACACTTCGGACTCAACAG-3' and Reverse 5'-  
113 AACCAAGCTAAATGCACCGAAT-3'

114 *Lysozyme*: Forward 5'-CTGTGGGATCAATTGCAGTG-3' and Reverse 5'-  
115 GCGAGGAAGTGTGACCTCTC-3'

116 *Cryptdin*: Forward 5'-AGGAGCAGCCAGGAGAAG-3' and Reverse 5'-  
117 ATGTTTCAGCGACAGCAGAG-3'

118 *TATA-binding protein (TBP)*: Forward 5'-TTGACCTAAAGACCATTGCAC-3' and  
119 Reverse 5'-TTCTCATGATGACTGCAGCAA-3'

120

121 Specificity of amplification products was verified considering the exponential  
122 amplification curves and the melting temperature analysis of the final amplification  
123 product.

124

125 **Compound profiling** - Selected compounds were profiled against a panel of protein  
126 phosphatases at Eurofins Pharma Discovery Services Ltd., Dundee, UK.

127 **SUPPLEMENTARY REFERENCES**

128

129 1 Hassepass, I. & Hoffmann, I. Assaying Cdc25 phosphatase activity. *Methods Mol*  
130 *Biol* **281**, 153-162, doi:10.1385/1-59259-811-0:153 (2004).

131 2 Krystyniak, A., Garcia-Echeverria, C., Prigent, C. & Ferrari, S. Inhibition of  
132 Aurora A in response to DNA damage. *Oncogene* **25**, 338-348, doi:1209056 [pii]  
133 10.1038/sj.onc.1209056 (2006).

134 3 Ferrari, S. *et al.* Aurora-A site specificity: a study with synthetic peptide  
135 substrates. *Biochem J* **390**, 293-302 (2005).

136 4 Pierroz, V. *et al.* Dual mode of cell death upon the photo-irradiation of a RuII  
137 polypyridyl complex in interphase or mitosis. *Chemical Science* **7**, 6115-6124,  
138 doi:10.1039/C6SC00387G (2016).

139 5 El-Shemerly, M., Hess, D., Pyakurel, A. K., Moselhy, S. & Ferrari, S. ATR-  
140 dependent pathways control hEXO1 stability in response to stalled forks. *Nucleic*  
141 *Acids Res* **36**, 511-519, doi:gkm1052 [pii] 10.1093/nar/gkm1052 (2008).

142 6 Bologna, S. *et al.* Sumoylation regulates EXO1 stability and processing of DNA  
143 damage. *Cell Cycle* **14**, 2439-2450, doi:10.1080/15384101.2015.1060381 (2015).

144 7 Valenta, T. *et al.* Wnt Ligands Secreted by Subepithelial Mesenchymal Cells Are  
145 Essential for the Survival of Intestinal Stem Cells and Gut Homeostasis. *Cell Rep*  
146 **15**, 911-918, doi:10.1016/j.celrep.2016.03.088 (2016).

147 8 Copeland, R. A. Evaluation of enzyme inhibitors in drug discovery. A guide for  
148 medicinal chemists and pharmacologists. *Methods Biochem Anal* **46**, 1-265  
149 (2005).

150

151 **SUPPLEMENTARY FIGURE LEGENDS**

152

153 **Figure S1 - Flow chart for hit selection and example of linear fragmentation**

154 (A) Flow diagram for the selection of CDC25 inhibitory compounds.

155 (B) Example of the linear fragmentation process for NSC-663284 and for  
156 indolyldihydroxyquinone, resulting in sets of molecular entities that were used to build a  
157 series of pharmacophore models.

158

159 **Figure S2 - Compound comparison and kinetic parameters for UPD-795**

160 (A) Magnification of the low concentration range for the compounds shown in Fig. 2A  
161 (left) in comparison with NSC-663284 (right). Dashed lines show the IC<sub>50</sub> for the most  
162 potent compounds.

163 (B) CDC25A, CDC25B and CDC25C were assayed at appropriate dilution with  
164 increasing substrate concentrations (0-6.25-12.5-25-50-100-200 μM) in the presence of  
165 UPD-795 (0.625 μM: ▲; 1.25 μM: ■; 2.5 μM: ●) or vehicle (: ▼).

166

167 **Figure S3 - Comparative cell viability assays**

168 (A, B) HeLa cells were treated with increasing amounts of the indicated compounds in  
169 comparison to the reference compound NSC-663284 and cell viability was determined.

170

171 **Figure S4 - Effect of selected compounds on U2OS cells**

172 Flow cytometric analysis of non-synchronized U2OS cells treated with the indicated  
173 compounds (10 μM) for 15h.

174

175 **Figure S5 - Cell cycle synchronization of HeLa cells and treatment with compounds**

176 (A) Flow cytometric analysis of 2x thymidine block-released HeLa cells displaying  
177 timely cell cycle progression.

178 (B) Double-thymidine synchronized cells were left untreated or treated with UPD-176 or  
179 UPD-795 (10 μM) at the point of release and examined for the indicated times.

180

181 **Figure S6 - Analysis DNA damage response**

182 (A) Flow cytometric analysis of  $\gamma$ H2AX induction by camptothecin (1  $\mu$ M, 4h).  
183 (B) Double-thymidine synchronized HeLa cells were treated with the indicated  
184 compounds (10  $\mu$ M) 5h upon release from the block and examined at 10h.

185

#### 186 **Figure S7 - Effect of CDC25 inhibitors on mitosis**

187 (A) Phase contrast stills of Kyoto HeLa cells (mCherry-H2B/EGFP- $\alpha$ -tubulin)  
188 synchronized by 2x thymidine block-release protocol and treated with vehicle alone  
189 (CTRL), UPD-787 (5  $\mu$ M) or UPD-790 (5  $\mu$ M) 5h upon release. Cells were visualized  
190 for 12h in a time-course fashion starting at 6h upon release from the 2x-thymidine block  
191 point and taking 4 frames per hour.

192 (B) Western blot analysis of PARP-1 cleavage using extracts of double-thymidine  
193 synchronized HeLa cells that were treated with the indicated compounds (10  $\mu$ M) 5h  
194 upon release from the block and examined at 10h.

195

#### 196 **Figure S8 - CDC25 expression in cancer cell lines**

197 Cytoplasmic (CE) and nuclear extracts (NE) of HeLa, A549 and Colo741 cells (50  $\mu$ g)  
198 were resolved on 10% SDS-polyacrylamide gels and expression of CDC25A, CDC25B  
199 (B1 = 64987 Da; B2 = 60756 Da) and CDC25C was revealed with appropriate  
200 antibodies. Molecular weight markers are indicated. PR: Ponceau Red.

201

#### 202 **Figure S9 - Analysis of sensitivity to CDC25 inhibitors**

203 Determination of P-values for the null-hypothesis (one curve fits all data) by non-linear  
204 regression analysis of the data and curve fitting comparison using the extra sum-of-  
205 squares F-test.

206

#### 207 **Figure S10 – Uncropped original Western blots for Figs. 4B, 4C, 5B and S8**

208

209 **SUPPLEMENTARY TABLES**

210

211 **Table S1 - Enzymatic assay on CDC25A with compounds of the first round of**  
212 **selection**

213 The compound concentration used in the assays was 20  $\mu$ M. NSC-663284 was used at  
214 concentration of 2  $\mu$ M. The results are displayed as activity remaining (%) in the  
215 presence of compound relative to control reactions conducted in the presence of vehicle  
216 alone (DMSO). Values are averages of duplicate determinations  $\pm$  standard deviations.  
217 One of two representative experiments is shown.

| <b>Compound</b> | <b>Class</b>               | <b>% remaining activity <math>\pm</math> SD</b> |
|-----------------|----------------------------|-------------------------------------------------|
| Ctrl            | DMSO                       | 100                                             |
| NSC-663284      | Quinolinedione             | 1.2 $\pm$ 0.9                                   |
| UPD-22          | Peptoid derivative         | 109.2 $\pm$ 3.3                                 |
| UPD-80          | Barbituric acid derivative | 93.6 $\pm$ 6.6                                  |
| UPD-86          | Barbituric acid derivative | 84.0 $\pm$ 1.1                                  |
| UPD-88          | Barbituric acid derivative | 37.3 $\pm$ 1.1                                  |
| UPD-93          | Barbituric acid derivative | 125.5 $\pm$ 2.1                                 |
| UPD-140         | Naphthoquinone             | 0.1 $\pm$ 0.1                                   |
| UPD-151         | Barbituric acid derivative | 123.9 $\pm$ 6.0                                 |
| UPD-155         | Barbituric acid derivative | 94.6 $\pm$ 3.1                                  |
| UPD-166         | Barbituric acid derivative | 97.5 $\pm$ 3.6                                  |
| UPD-168         | Barbituric acid derivative | 121.3 $\pm$ 3.2                                 |
| UPD-170         | Barbituric acid derivative | 88.2 $\pm$ 11.3                                 |
| UPD-172         | Barbituric acid derivative | 22.7 $\pm$ 2.7                                  |
| UPD-175         | Naphthoquinone             | 38.5 $\pm$ 6.9                                  |
| UPD-176         | Naphthoquinone             | 0.0 $\pm$ 0.2                                   |
| UPD-182         | Anthraquinone              | 46.9 $\pm$ 6.2                                  |
| UPD-187         | Anthraquinone              | 62.4 $\pm$ 10.0                                 |
| UPD-196         | Anthraquinone              | 89.6 $\pm$ 2.9                                  |
| UPD-197         | Anthraquinone              | 101.8 $\pm$ 1.6                                 |
| UPD-200         | Anthraquinone              | 118.7 $\pm$ 0.5                                 |
| UPD-568         | Anthracene                 | 92.7 $\pm$ 11.4                                 |



|          |                |              |
|----------|----------------|--------------|
| UPD-576  | Coumarin       | 105.2 ± 21.0 |
| UPD-872  | Naphthoquinone | 118.8 ± 15.0 |
| UPD-937  | Indolin-dione  | 85.8 ± 7.8   |
| UPD-1300 | Quinolone      | 120.1 ± 0.7  |
| UPD-1467 | Quinone        | 111.7 ± 11.4 |

218  
219  
220  
221  
222  
223  
224  
225  
226  
227  
228  
229  
230

**Table S2 - Enzymatic assay on CDC25A with compounds of the second round of selection**

The compound concentration used was 20 μM. NSC-663284 was tested at concentration of 2 μM. The results are displayed as activity remaining (%) in the presence of compound relative to control reactions conducted in the presence of vehicle alone (DMSO). Values are averages of duplicate determinations ± standard deviations. One of two representative experiments is shown. Chemical structures were generated using 2D Sketcher, ChemDoodle®. Structures of compounds inhibiting CDC25A >90% are shown.

| Compound   | Structure                                                                           | Class          | % remaining activity ± SD |
|------------|-------------------------------------------------------------------------------------|----------------|---------------------------|
| Ctrl       |                                                                                     | DMSO           | 100.0                     |
| NSC-663284 | 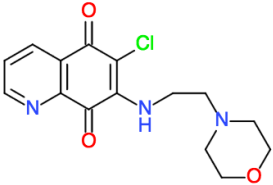 | Quinolinedione | 0.5 ± 0.6                 |
| UPD-140    |  | Naphthoquinone | 0.1 ± 0.4                 |
| UPD-176    |  | Naphthoquinone | 0.0 ± 0.2                 |

|         |                                                                                     |                |                |
|---------|-------------------------------------------------------------------------------------|----------------|----------------|
| UPD-596 | 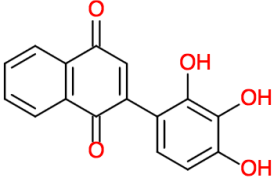   | Naphthoquinone | $0.0 \pm 0.1$  |
| UPD-597 |    | Naphthoquinone | $3.1 \pm 0.3$  |
| UPD-724 |    | Anthraquinone  | $98.9 \pm 1.4$ |
| UPD-738 |   | Naphthoquinone | $5.9 \pm 0.1$  |
| UPD-786 |  | Naphthoquinone | $0.0 \pm 0.4$  |
| UPD-787 |  | Naphthoquinone | $0.1 \pm 0.3$  |
| UPD-788 |  | Naphthoquinone | $70.1 \pm 2.0$ |

|          |                                                                                     |                |                |
|----------|-------------------------------------------------------------------------------------|----------------|----------------|
| UPD-790  | 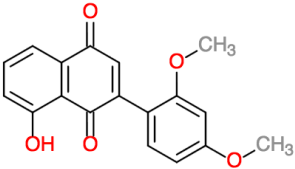   | Naphthoquinone | $5.6 \pm 1.2$  |
| UPD-793  |    | Naphthoquinone | $1.0 \pm 0.1$  |
| UPD-795  |    | Naphthoquinone | $0.0 \pm 0.0$  |
| UPD-797  |    | Naphthoquinone | $8.5 \pm 0.1$  |
| UPD-798  |   | Naphthoquinone | $41.4 \pm 0.4$ |
| UPD-1382 |  | Naphthoquinone | $94.4 \pm 0.6$ |
| UPD-1416 |  | Quinone        | $4.1 \pm 0.0$  |
| UPD-1419 |  | Quinone        | $1.9 \pm 0.3$  |

231

232 **Table S3 - Kinetic parameters for UPD-795**

233 The compound was incubated with CDC25 as described in Materials and Methods. Data  
 234 were plotted using Prism software and kinetic parameters were calculated using non-  
 235 linear regression of Michaelis-Menten curves with least-squares fit of the data and the  
 236 mixed-model inhibition equation <sup>8</sup>.

237

|                  | <b>CDC25A</b>  | <b>CDC25B</b>  | <b>CDC25C</b>  |
|------------------|----------------|----------------|----------------|
| $K_i$ [ $\mu$ M] | 1.18 $\pm$ 0.4 | 0.44 $\pm$ 0.1 | 0.85 $\pm$ 0.3 |

238

239

240

241 **Table S4 - Compound profiling**

242 Enzymatic assays on selected phosphatases. The final concentration of UPD-795 and  
 243 UPD-140 were 1  $\mu$ M and 1.5  $\mu$ M, respectively. Results are displayed as remaining  
 244 activity (%) in the presence of compound relative to control reactions conducted in the  
 245 presence of vehicle alone (DMSO). Values are averages of duplicate determinations  $\pm$   
 246 standard deviation.

247

| <b>Phosphatase</b> | <b>UPD-795</b> | <b>UPD-140</b> |
|--------------------|----------------|----------------|
| Ctrl               | 100            | 100            |
| PTPRC (CD45)       | 97 $\pm$ 2     | 103 $\pm$ 2    |
| DUSP22             | 92 $\pm$ 3     | 90 $\pm$ 4     |
| PTPN7 (HePTP)      | 87 $\pm$ 2     | 95             |
| MKP5 (DUSP10)      | 107 $\pm$ 1    | 109            |
| PP1 $\alpha$       | 88 $\pm$ 1     | 89 $\pm$ 2     |
| PP2A               | 94 $\pm$ 1     | 95 $\pm$ 2     |
| PP5                | 51 $\pm$ 6     | 43 $\pm$ 7     |
| PTPN4 (MEG1)       | 94 $\pm$ 1     | 87 $\pm$ 1     |
| PTPN9 (MEG2)       | 85 $\pm$ 5     | 89             |
| PTPN1 (PTP1B)      | 94 $\pm$ 7     | 95 $\pm$ 5     |
| PTPN22             | 98 $\pm$ 1     | 99 $\pm$ 5     |
| PTPN6 (SHP-1)      | 80 $\pm$ 3     | 78 $\pm$ 2     |
| PTPN11 (SHP-2)     | 91 $\pm$ 14    | 96 $\pm$ 2     |
| PTPN2 (TCPTP)      | 99 $\pm$ 2     | 87 $\pm$ 8     |
| TMDP (DUSP13)      | 100            | 105 $\pm$ 4    |
| VHR (DUSP3)        | 108 $\pm$ 4    | 106 $\pm$ 4    |

248

249

250

251

252 **SUPPLEMENTARY MOVIES**

253

254 **Movie M1 - Mitotic transition in control-treated Kyoto HeLa cells**

255 Time course visualization of mitotic transition in Kyoto HeLa cells treated with vehicle  
256 and visualized as described in Fig. S7.

257

258 **Movie M2 - Mitotic transition in UPD-787-treated Kyoto HeLa cells**

259 Time course visualization of mitotic transition in Kyoto HeLa cells treated with UPD-787  
260 (5  $\mu$ M) and visualized as described in Fig. S7.

261

262 **Movie M3 - Mitotic transition in UPD-790-treated Kyoto HeLa cells**

263 Time course visualization of mitotic transition in Kyoto HeLa cells treated with UPD-790  
264 (5  $\mu$ M) and visualized as described in Fig. S7.

265

**A**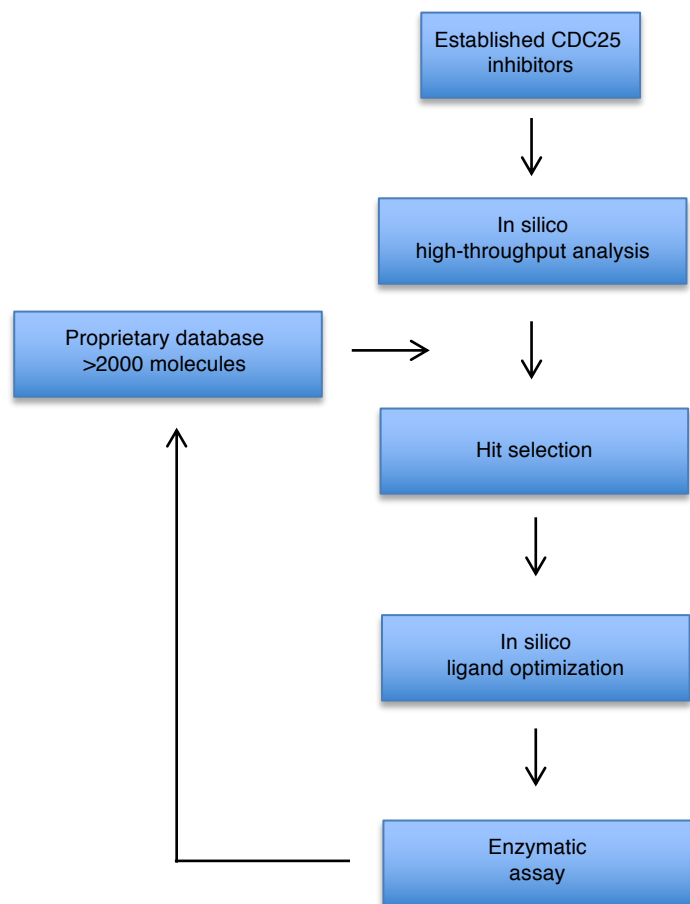**B**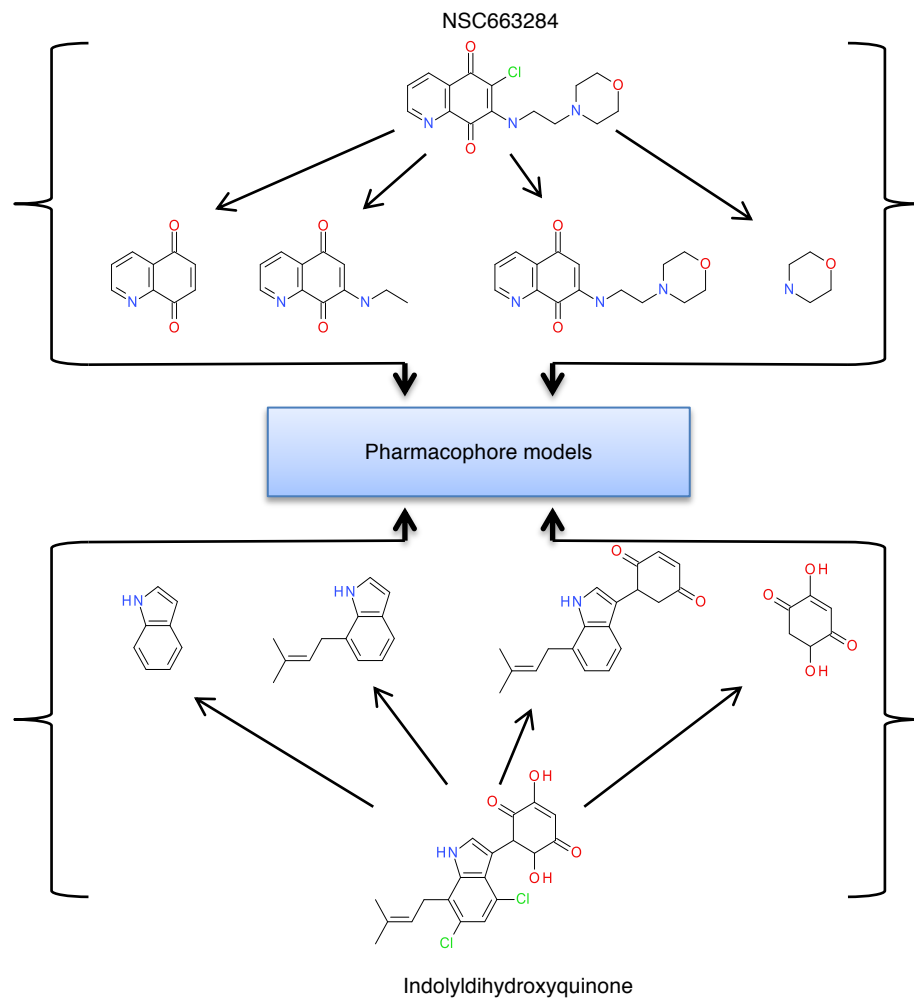

Figure S1

**A**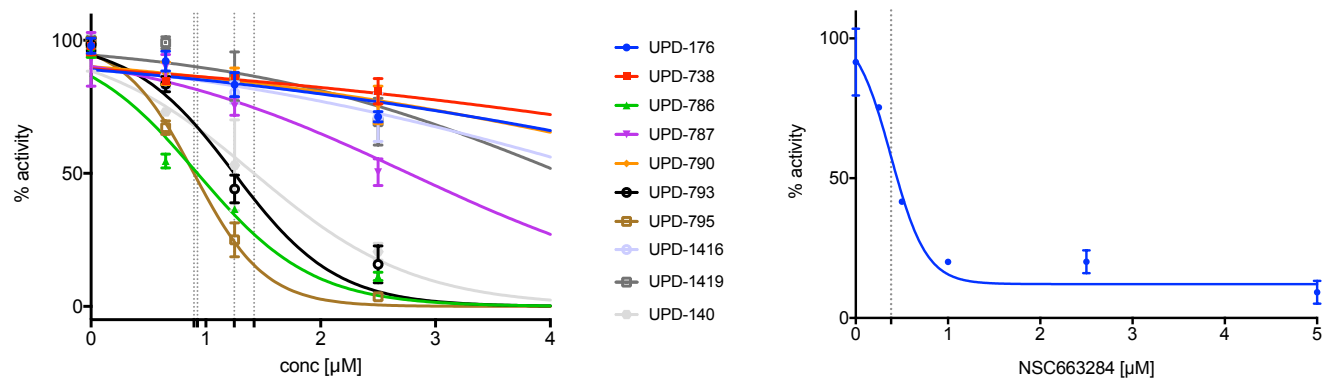**B**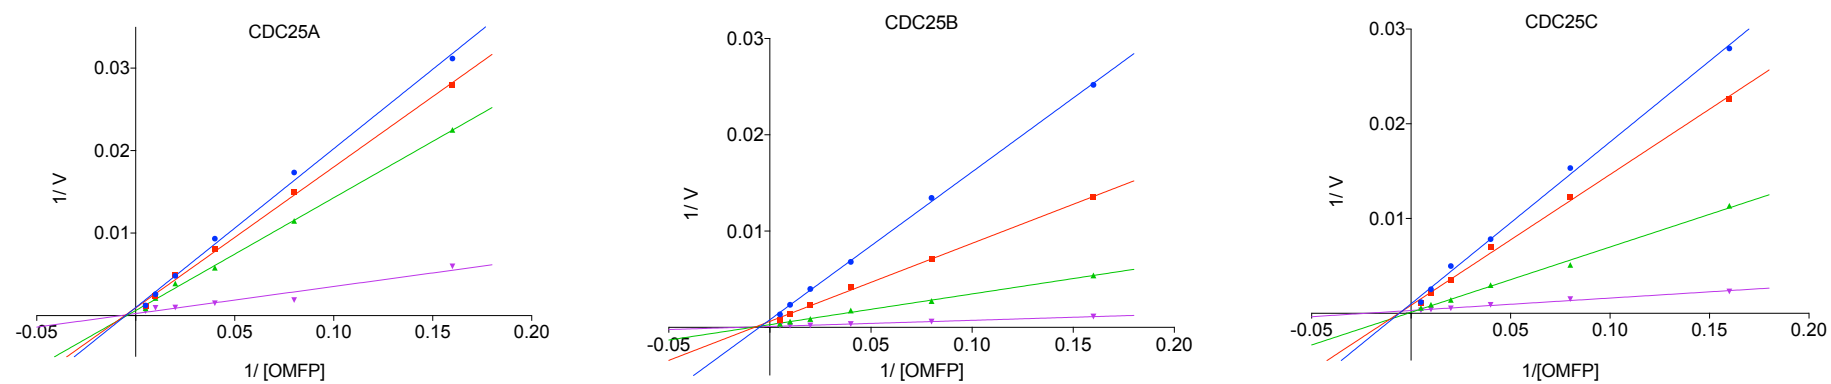

**A**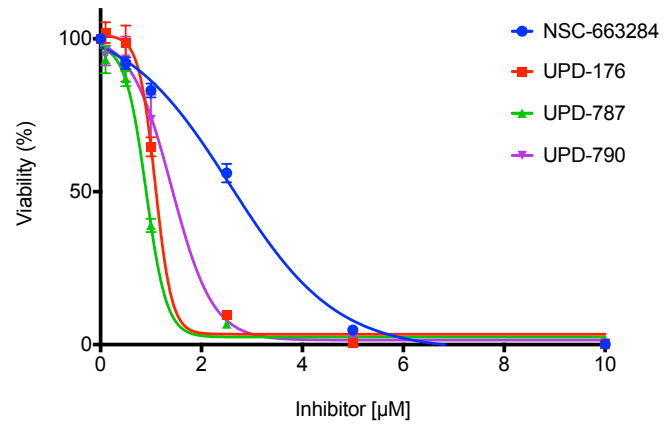**B**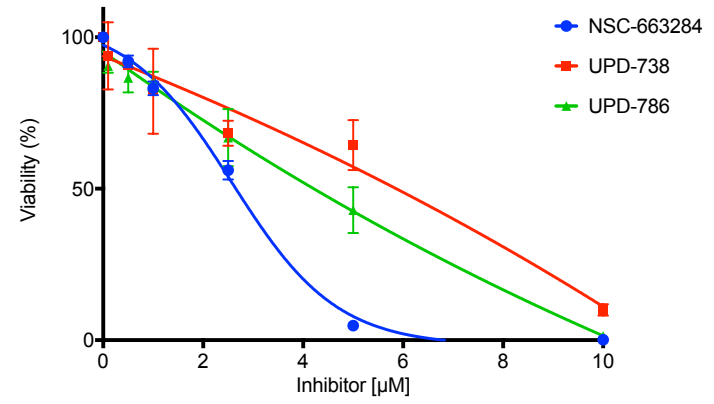



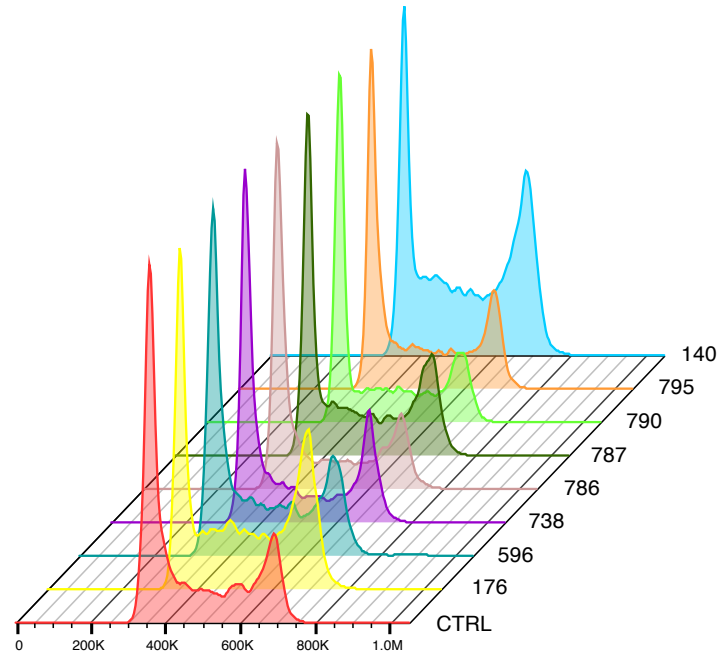

Figure S4

**A**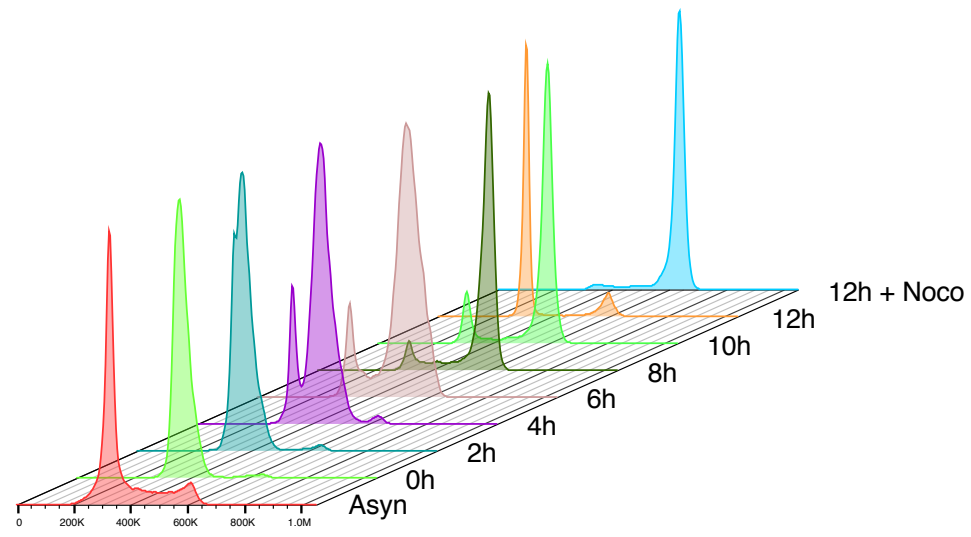**B**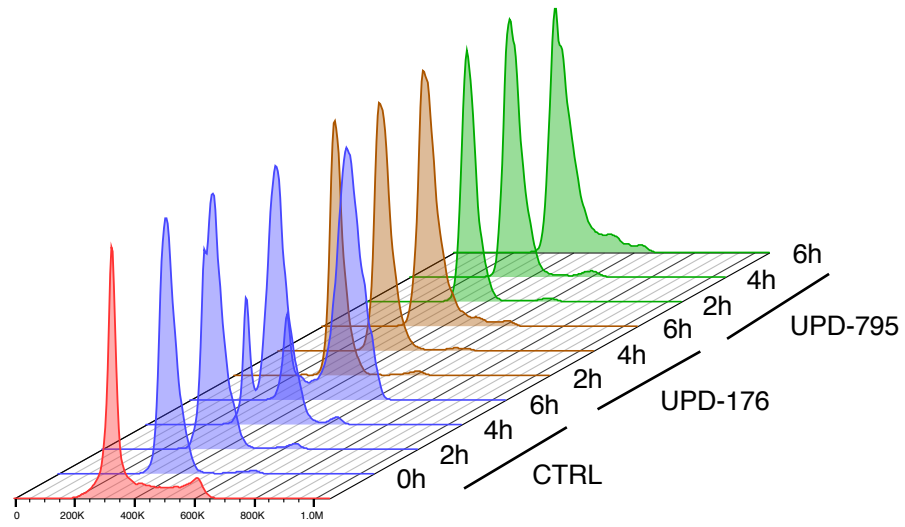

**A**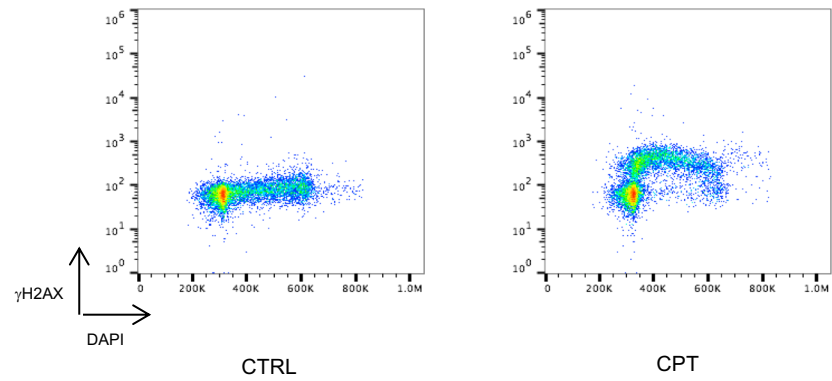**B**

DTB: 10h release

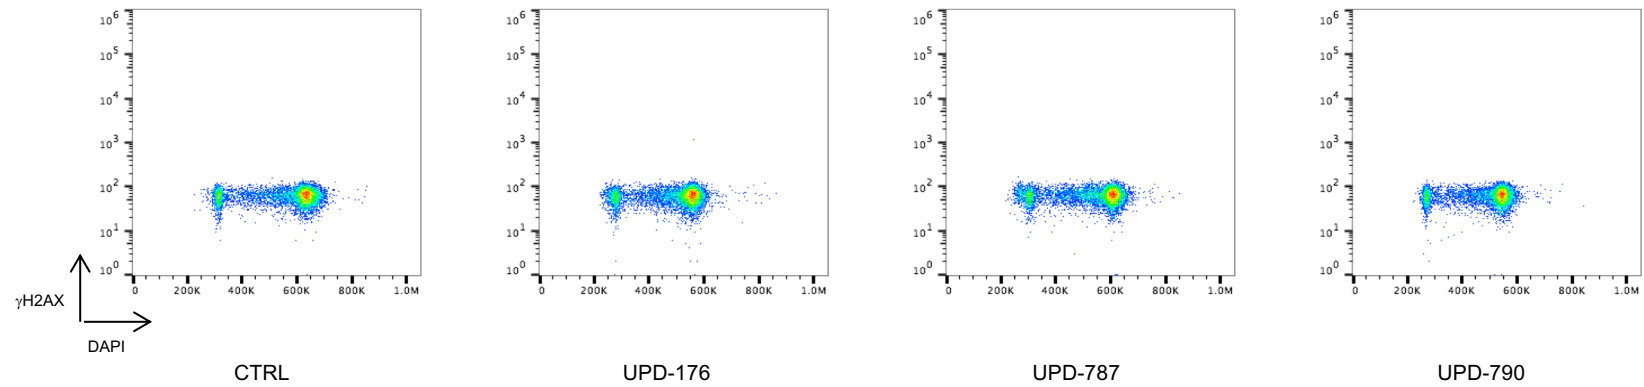

**A**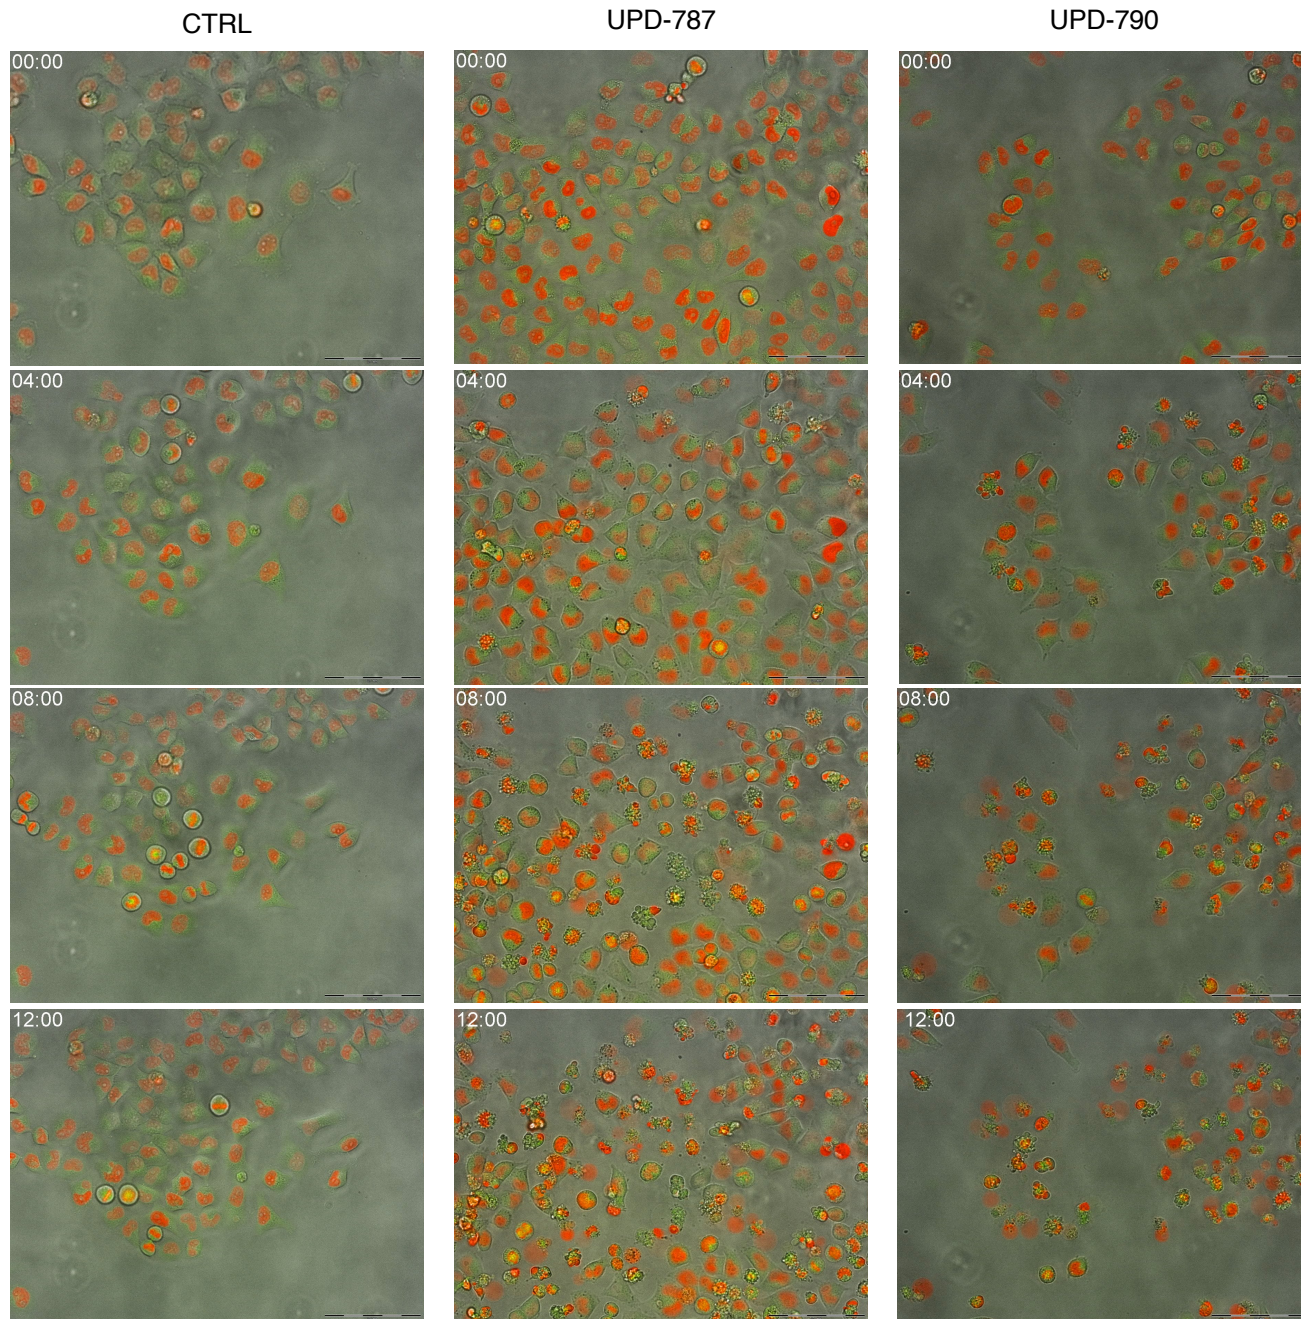**B**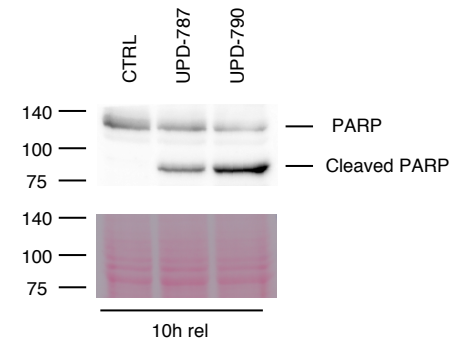

Figure S7

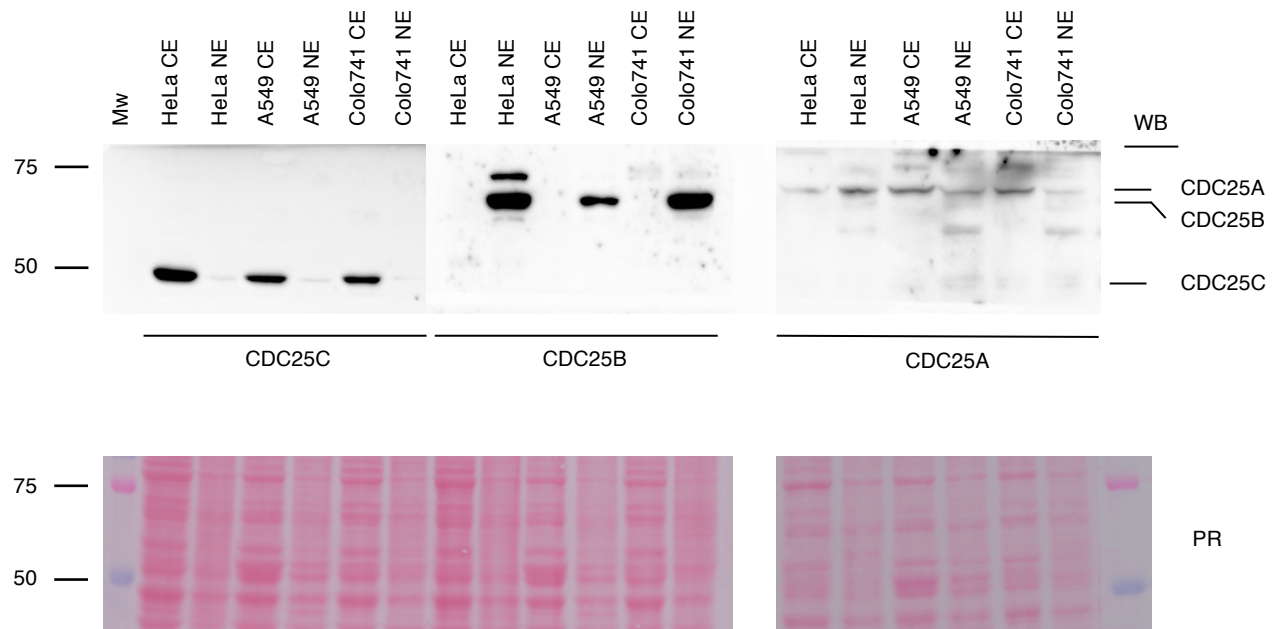

Figure S8

| Nonlin fit<br>Table of results |                                          | A                       | B                       | C                                 |
|--------------------------------|------------------------------------------|-------------------------|-------------------------|-----------------------------------|
|                                |                                          | 176 Cdc25A <sup>+</sup> | 176 Cdc25A <sup>-</sup> | Global (shared)                   |
|                                |                                          | Y                       | Y                       | Y                                 |
| 1                              | <b>Comparison of Fits</b>                |                         |                         |                                   |
| 2                              | Null hypothesis                          |                         |                         | One curve for all data sets       |
| 3                              | Alternative hypothesis                   |                         |                         | Different curve for each data set |
| 4                              | P value                                  |                         |                         | <0.0001                           |
| 5                              | Conclusion (alpha = 0.05)                |                         |                         | Reject null hypothesis            |
| 6                              | Preferred model                          |                         |                         | Different curve for each data set |
| 7                              | F (DFn, DFd)                             |                         |                         | 11.90 (4, 30)                     |
| 8                              |                                          |                         |                         |                                   |
| 9                              | <b>Different curve for each data set</b> |                         |                         |                                   |
| 10                             | <b>Best-fit values</b>                   |                         |                         |                                   |
| 11                             | Bottom                                   | 0.8187                  | 4.684                   |                                   |
| 12                             | Top                                      | 145.7                   | 112.6                   |                                   |
| 13                             | LogIC50                                  | 1.359                   | 1.460                   |                                   |
| 14                             | HillSlope                                | -0.2684                 | -0.7443                 |                                   |
| 15                             | IC50                                     | 22.86                   | 28.81                   |                                   |
| 16                             | Span                                     | 144.9                   | 107.9                   |                                   |
| 17                             | <b>Std. Error</b>                        |                         |                         |                                   |
| 18                             | Bottom                                   | 2.513                   | 2.339                   |                                   |
| 19                             | Top                                      | 20.56                   | 6.748                   |                                   |
| 20                             | LogIC50                                  | 0.4879                  | 0.1231                  |                                   |
| 21                             | HillSlope                                | 0.04193                 | 0.1308                  |                                   |
| 22                             | Span                                     | 21.87                   | 7.568                   |                                   |

| Nonlin fit<br>Table of results |                                          | A                       | B                       | C                                 |
|--------------------------------|------------------------------------------|-------------------------|-------------------------|-----------------------------------|
|                                |                                          | 787 Cdc25A <sup>+</sup> | 787 Cdc25A <sup>-</sup> | Global (shared)                   |
|                                |                                          | Y                       | Y                       | Y                                 |
| 1                              | <b>Comparison of Fits</b>                |                         |                         |                                   |
| 2                              | Null hypothesis                          |                         |                         | One curve for all data sets       |
| 3                              | Alternative hypothesis                   |                         |                         | Different curve for each data set |
| 4                              | P value                                  |                         |                         | <0.0001                           |
| 5                              | Conclusion (alpha = 0.05)                |                         |                         | Reject null hypothesis            |
| 6                              | Preferred model                          |                         |                         | Different curve for each data set |
| 7                              | F (DFn, DFd)                             |                         |                         | 37.39 (4, 34)                     |
| 8                              |                                          |                         |                         |                                   |
| 9                              | <b>Different curve for each data set</b> |                         |                         |                                   |
| 10                             | <b>Best-fit values</b>                   |                         |                         |                                   |
| 11                             | Bottom                                   | -0.4542                 | 2.256                   |                                   |
| 12                             | Top                                      | 134.8                   | 137.4                   |                                   |
| 13                             | LogIC50                                  | 1.873                   | 0.8877                  |                                   |
| 14                             | HillSlope                                | -0.2748                 | -0.5184                 |                                   |
| 15                             | IC50                                     | 74.68                   | 7.722                   |                                   |
| 16                             | Span                                     | 135.2                   | 135.1                   |                                   |
| 17                             | <b>Std. Error</b>                        |                         |                         |                                   |
| 18                             | Bottom                                   | 3.348                   | 1.754                   |                                   |
| 19                             | Top                                      | 18.00                   | 15.56                   |                                   |
| 20                             | LogIC50                                  | 0.4672                  | 0.2176                  |                                   |
| 21                             | HillSlope                                | 0.05121                 | 0.07094                 |                                   |
| 22                             | Span                                     | 19.73                   | 16.21                   |                                   |

Figure S9

Fig 4B\_top

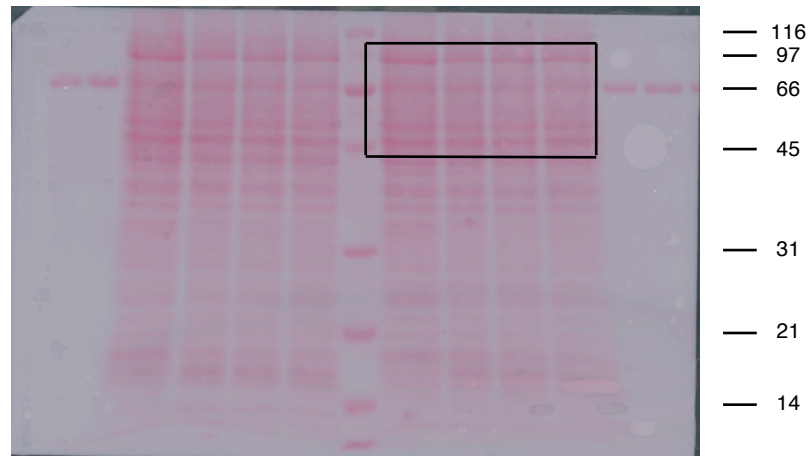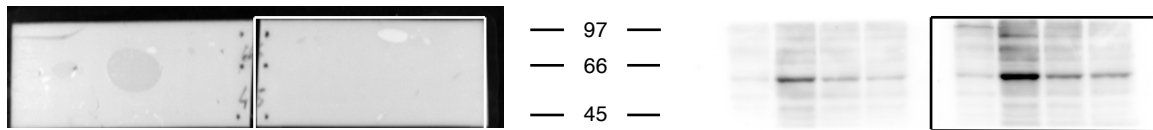

50 ug cell extracts on 12% gel;  
Primary: MPM2 monoclonal (Upstate) 1:1000 in 2% BSA  
Secondary: anti mouse HRP 1:5000 in 2% BSA

Fig 4B\_bottom

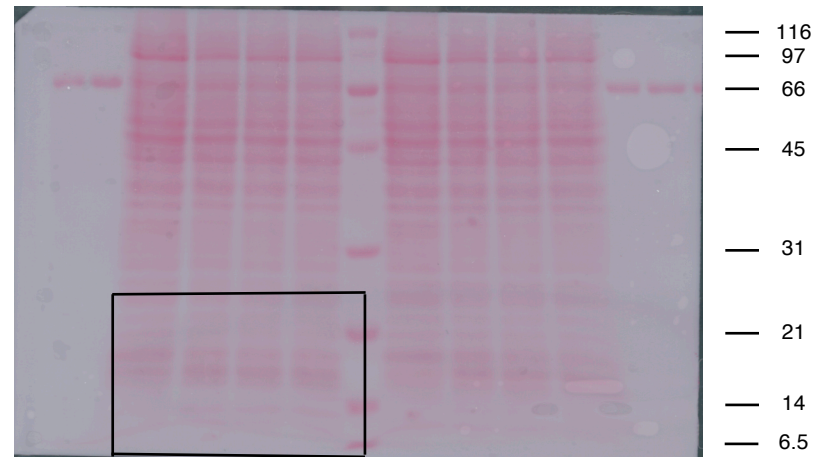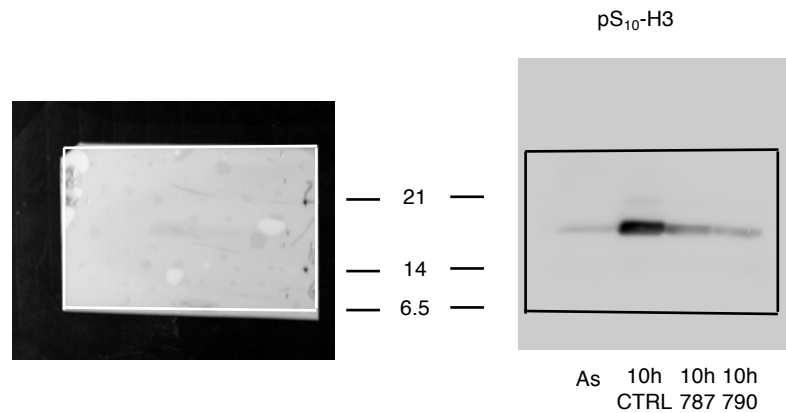

50 ug HeLa extracts on 12% gel  
Primary antibody: rabbit anti-pH3-S10 (CST) 1:1000 in 2% BSA  
Secondary antibody: anti-rabbit HRP 1:5000 in 2% BSA



Fig 4C

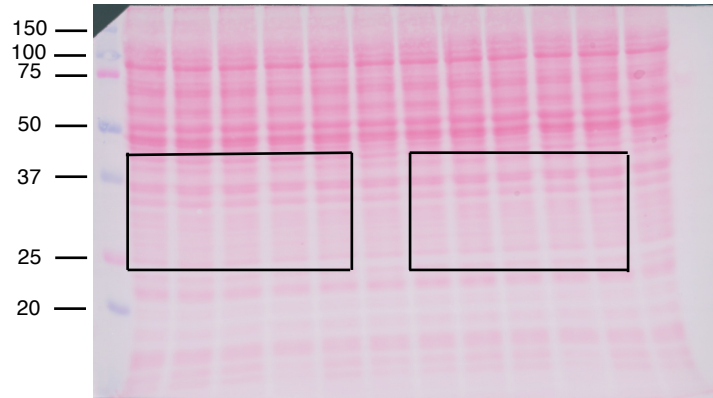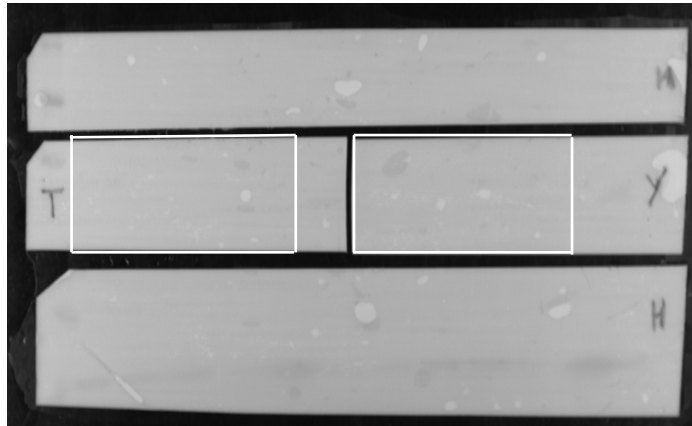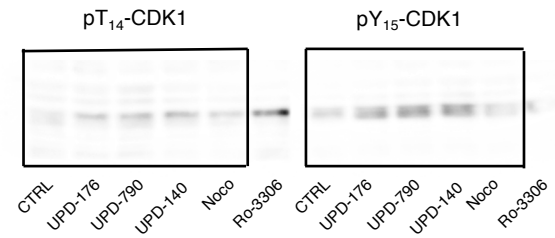

100 ug HeLa extracts on 12% gel  
Primary antibody: rabbit anti-pCDK1-T14, rabbit anti pCDK1-Y15 (CST) 1:1000 in 2% BSA  
Secondary antibody: anti-rabbit HRP 1:5000 in 2% BSA

**Fig 5B**

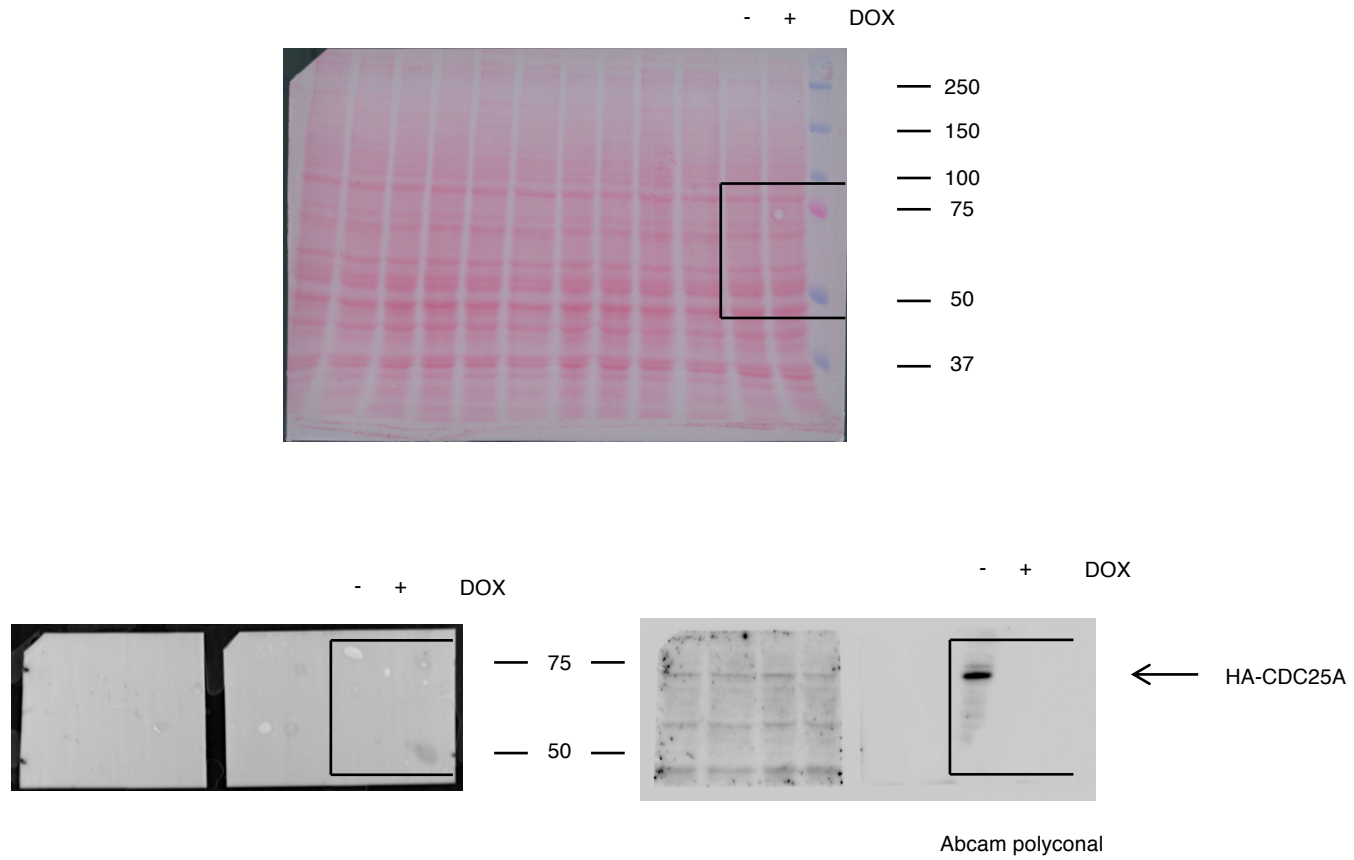

50 ug cell extracts on 10% gel;  
Primary: HA rabbit polyclonal (Abcam) 1:1000 in 2% BSA  
Secondary: anti rabbit HRP 1:5000 in 2% BSA

Fig S8\_left

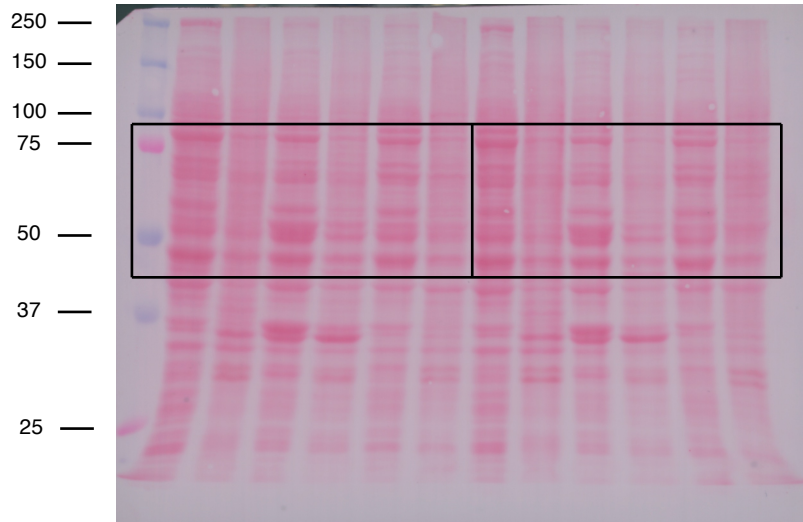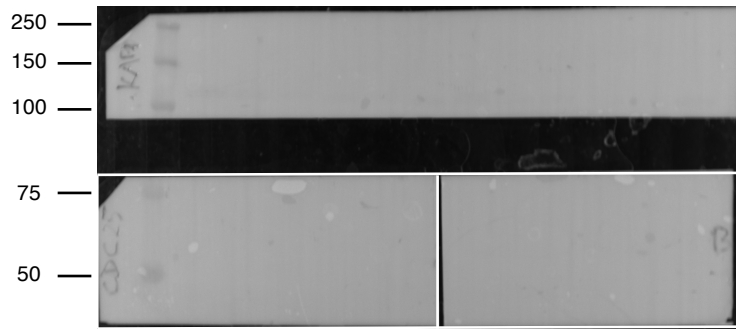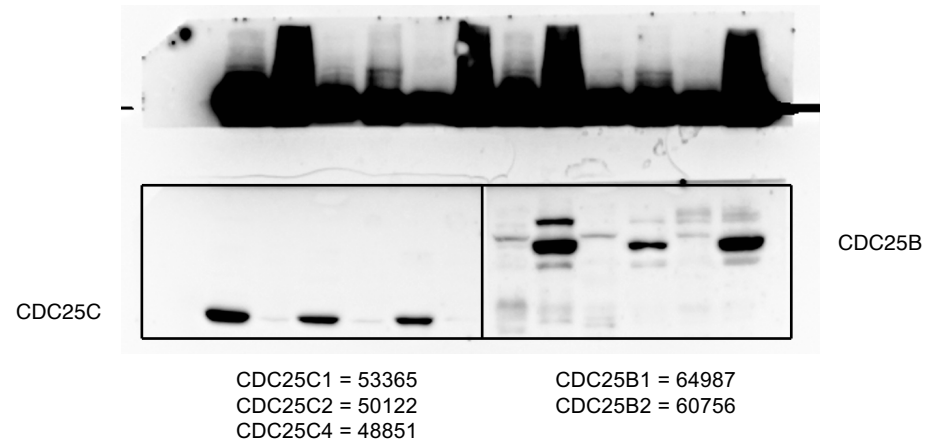

100 ug cell extracts on 10% gel

Primary: CDC25C rabbit polyclonal (S.Cruz C-20) 1:100 in 2.5% milk; CDC25B rabbit monoclonal (CST) 1:500 in 2.5% milk

Secondary: anti-rabbit 1:5000 in 2.5% milk

Fig S8\_right

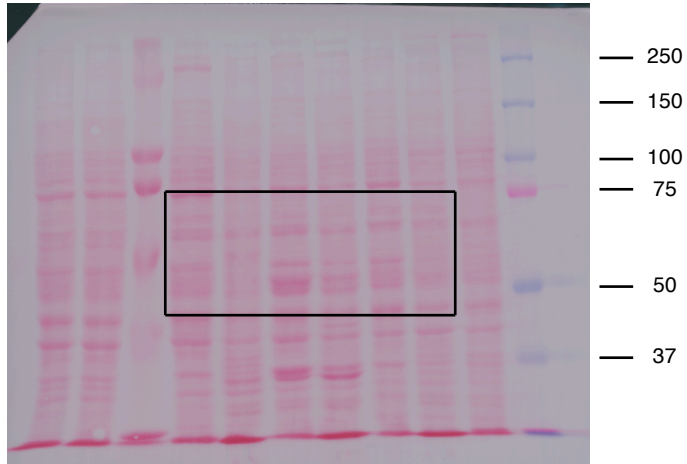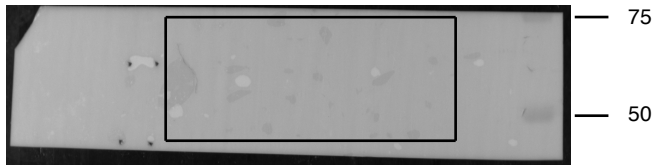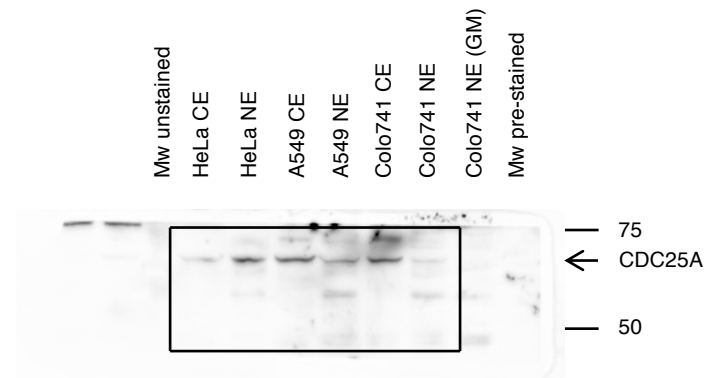

30 ug cell extracts on 8% gel  
Primary: CDC25A monoclonal F6 1:250 in 5% milk  
Secondary: anti-mouse IgG-k 1:5000 in milk
